# Supplementary material for: Preparation of Activated Carbons from Spent Coffee Grounds and Coffee Parchment and Assessment of Their Adsorbent Efficiency
Source: MDPI journal article supplement (doi:10.3390/pr9081396), 2021-08-12
Supplement: s1 [file s1]

## Supplementary Material

### **Preparation of activated carbons from spent coffee grounds and coffee parchment and assessment of their adsorbent efficiency**

**Gustavo A. Figueroa Campos<sup>1</sup>, Jeffrey Paulo H. Perez<sup>2</sup>, Inga Block<sup>3</sup>, Sorel Tchewonpi Sagu<sup>1</sup>, Pedro Saravia Celis<sup>2</sup>, Andreas Taubert<sup>3</sup> and Harshadrai M. Rawel<sup>1\*</sup>**

<sup>1</sup>Institute of Nutritional Science, University of Potsdam, Arthur-Scheunert-Allee 114-116, 14558 Nuthetal Germany; [figueroacamp@uni-potsdam.de](mailto:figueroacamp@uni-potsdam.de), [sorelsagu@uni-potsdam.de](mailto:sorelsagu@uni-potsdam.de), [rawel@uni-potsdam.de](mailto:rawel@uni-potsdam.de)

<sup>2</sup>GFZ German Research Centre for Geosciences, Telegrafenberg, 14473 Potsdam, Germany; [jpperez@gfz-potsdam.de](mailto:jpperez@gfz-potsdam.de)

<sup>3</sup>Institute of Chemistry, University of Potsdam, Karl-Liebknecht-Str. 24-25, 14476, Potsdam, Germany; [iblock@uni-potsdam.de](mailto:iblock@uni-potsdam.de); [ataubert@uni-potsdam.de](mailto:ataubert@uni-potsdam.de)

<sup>4</sup>Regional School of Sanitary Engineering and Water Resources (ERIS), University of San Carlos of Guatemala, Ciudad Universitaria zona 12, Guatemala; [pcsaraviac@gmail.com](mailto:pcsaraviac@gmail.com)

\* Corresponding author.

Tel: +49-33200-88-5525/5578 (H.R.)

E-mail: [rawel@uni-potsdam.de](mailto:rawel@uni-potsdam.de)

## **Content**

**Figure S1** HPLC-MS chromatogram for organic acids comparing coffee wastewater after adsorption onto parchment (a), spent coffee grounds (b), and commercial activated carbons (c). Adsorbent dose of 10% (w/v) and 4 hours contact time at room temperature.

**Figure S2** HPLC-MS/MS total ion current spectrum, comparing coffee wastewater after adsorption onto parchment (a), spent coffee grounds (b), and commercial activated carbons (c). Hydrophilic compounds from 2 – 6 minutes and hydrophobic compounds from 6 – 19 minutes. Adsorbent dose of 10% (w/v) and 4 hours contact time at room temperature.

**Table S1** Classification of infrared bands

**Table S2** Langmuir and Freundlich isotherm model parameters obtained from the nonlinear fitting for spent coffee grounds, parchment, and commercial activated carbons.

**Table S3** Adsorption efficiency of hydrophilic and hydrophobic compounds from coffee wastewater on spent coffee grounds, parchment, and commercial activated carbons.

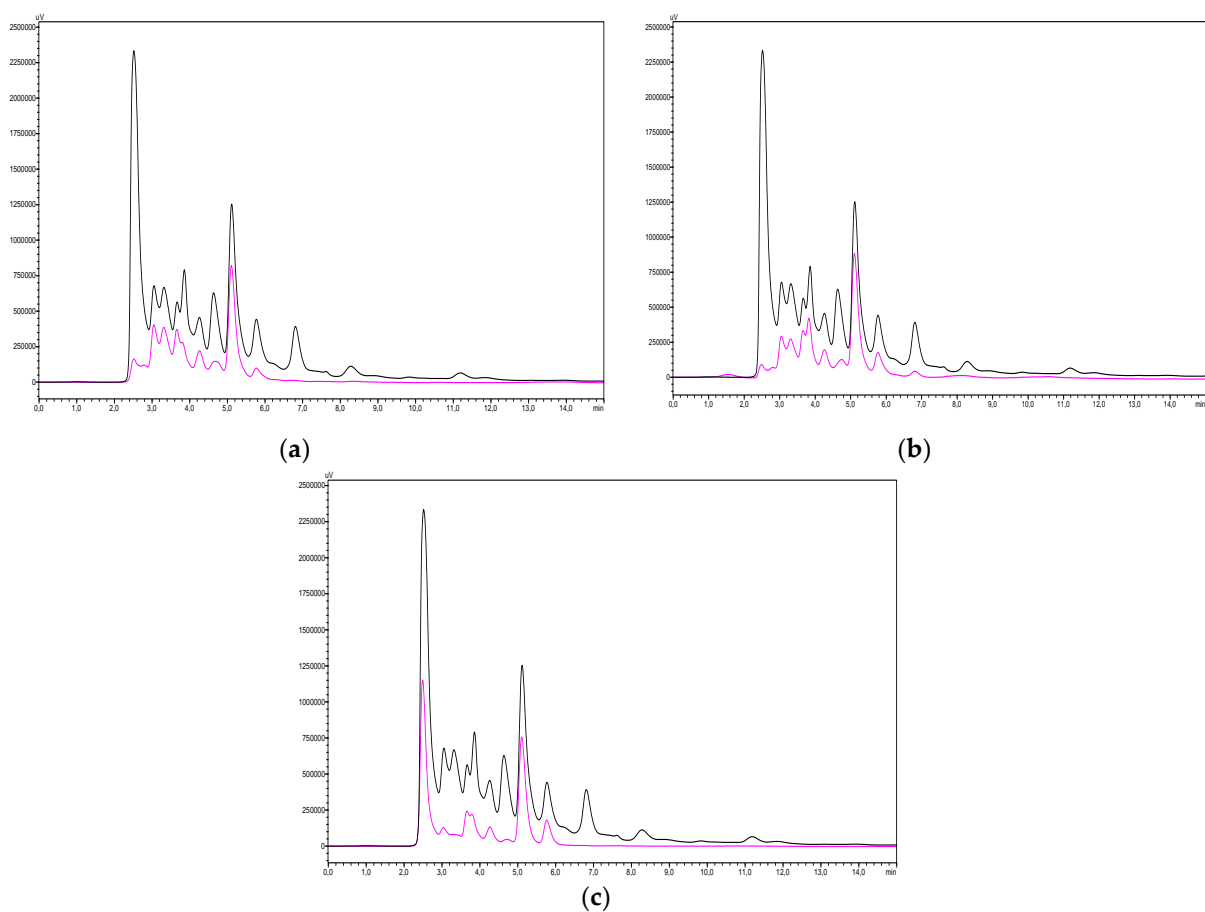

**Figure S1** HPLC-MS chromatogram for organic acids comparing coffee wastewater after adsorption onto parchment (a), spent coffee grounds (b), and commercial activated carbons (c). Adsorbent dose of 10% (w/v) and 4 hours contact time at room temperature.

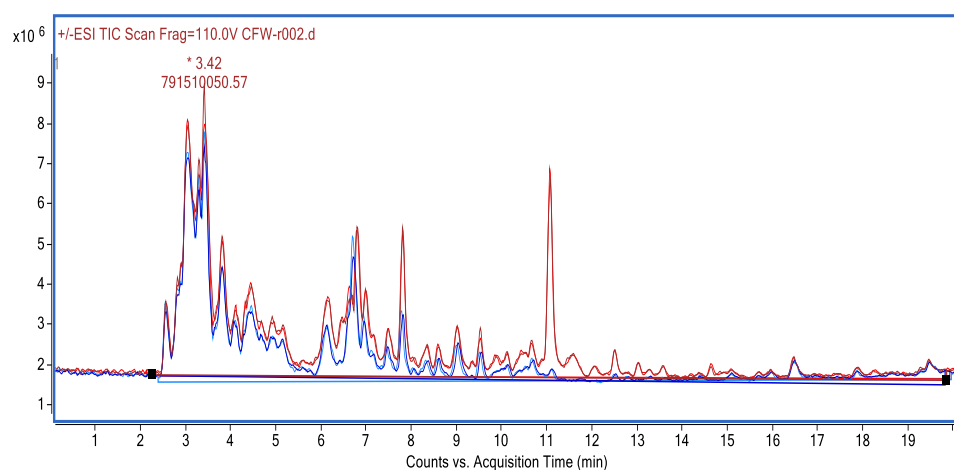

(a)

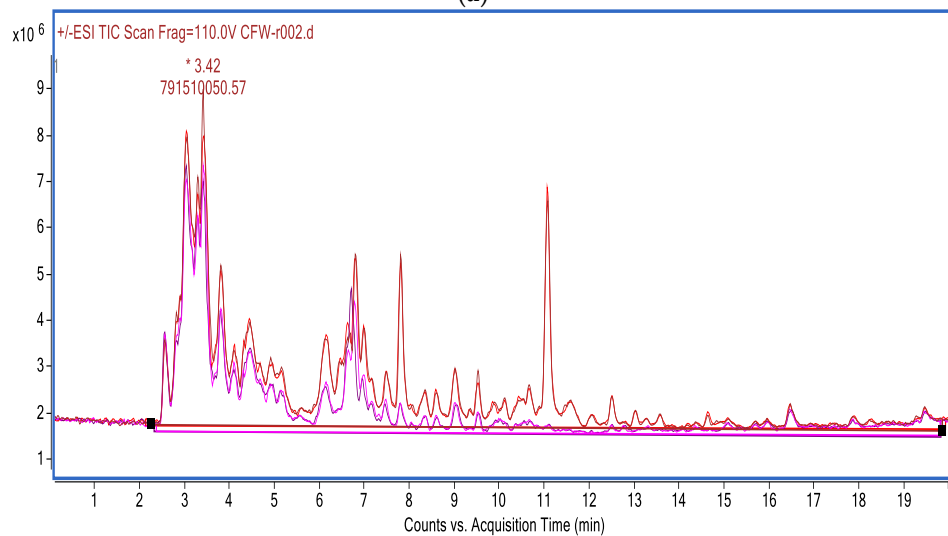

(b)

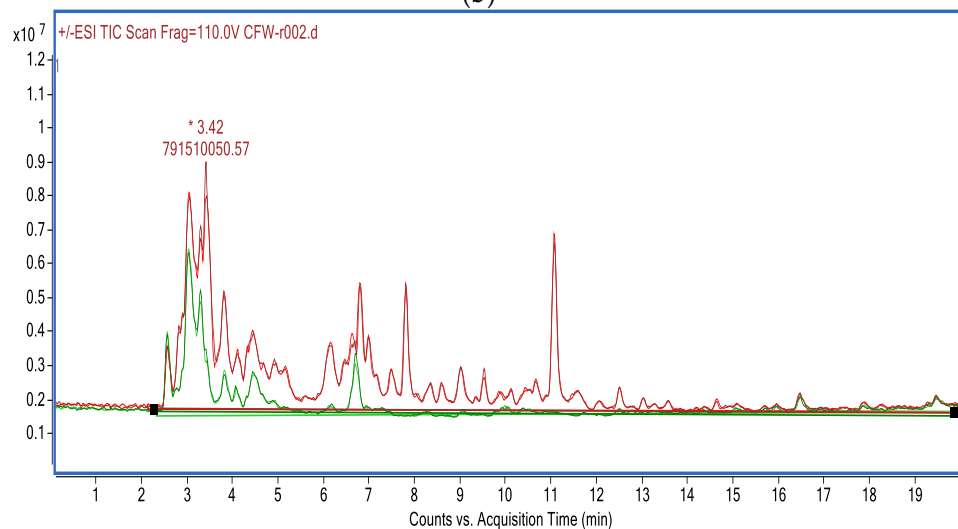

(c)

**Figure S2** HPLC-MS/MS total ion current spectrum, comparing coffee wastewater after adsorption onto parchment (a), spent coffee grounds (b), and commercial activated carbons (c). Hydrophilic compounds from 2 – 6 minutes and hydrophobic compounds from 6 – 19 minutes. Adsorbent dose of 10% (w/v) and 4 hours contact time at room temperature.

**Table S1** Classification of infrared bands

| Wavenumber (cm <sup>-1</sup> ) | Classification                                                                             |
|--------------------------------|--------------------------------------------------------------------------------------------|
| 3500–3300                      | O–H (stretching, intermolecular)                                                           |
| 2930–2840                      | C–H (amorphous cellulose, caffeine), aromatic methoxyl and methylene groups, methyl groups |
| 1740                           | C=O (stretching, esters)                                                                   |
| 1700–1600                      | caffeine, chlorogenic acids                                                                |
| 1600–1300                      | C=C (aromatic compounds, oils, caffeine)                                                   |
| 1430                           | C–H <sub>2</sub> (crystallinity bond of cellulose)                                         |
| 1284–1240                      | C–O (aromatic ethers, esters, phenol)                                                      |
| 1100–900                       | C–O (polysaccharides)                                                                      |
| 900–800                        | B–glycosidic bond of cellulose                                                             |

**Table S2** Langmuir and Freundlich isotherm model parameters obtained from the nonlinear fitting for spent coffee grounds, parchment, and commercial activated carbon.

| Isotherms  | Coefficients | Units                   | Spent coffee grounds | Parchment | Commercial activated carbon |
|------------|--------------|-------------------------|----------------------|-----------|-----------------------------|
| Langmuir   | $q_m$        | mg/g                    | 13.99                | 29.89     | 93.48                       |
|            | $K_L$        | L/mg                    | 0.0024               | 0.0049    | $3.07 \times 10^{-4}$       |
|            | $R^2$        | -                       | 0.89                 | 0.87      | 0.96                        |
| Freundlich | $n$          | -                       | 7.07                 | 9.62      | 2.39                        |
|            | $K_F$        | mg/g (L/g) <sup>n</sup> | 3.63                 | 9.62      | 1.41                        |
|            | $R^2$        | -                       | 0.63                 | 0.54      | 0.88                        |

**Table S3** Adsorption efficiency of hydrophilic and hydrophobic compounds from coffee wastewater on spent coffee grounds, parchment, and commercial activated carbons.

| Activated carbon     | Adsorption efficiency of hydrophilic components | Adsorption efficiency of hydrophobic components |
|----------------------|-------------------------------------------------|-------------------------------------------------|
| Spent coffee grounds | $14.35 \pm 1.44\%$                              | $43.04 \pm 1.99\%$                              |
| Parchment            | $12.45 \pm 3.32\%$                              | $44.43 \pm 2.61\%$                              |
| Commercial           | $47.90 \pm 1.19\%$                              | $83.57 \pm 1.96\%$                              |
